# Supplementary material for: Peridroplet mitochondria in fatty liver and their role in the prevention of NAFLD by diethyldithiocarbamate
Source: Research Square preprint supplement (doi:10.21203/rs.3.rs-2800486/v1), 2023-04-21
Supplement: Supplementary file 1 [file d0910a462e0d4443652672e9.xlsx]

## Sheet: Sheet1
Name of TGs	CD1	CD2	CD3	CD4	CD5	CDAA1	CDAA2	CDAA3	CDAA4	CDAA5	CDAA+DDC1	CDAA+DDC2	CDAA+DDC3	CDAA+DDC4	CDAA+DDC5
TG(12:0/12:0/16:0)	0.325445	0.134936	0.37851	0.301867	0.280985	0.792393	2.75252	1.03925	1.34563	1.15374	2.08455	1.53857	2.04928	1.5072	1.72106
TG(12:0/14:0/16:1)	0.333148	0.112724	0.445936	0.406766	0.336836	1.63647	5.23437	2.41244	3.85903	2.53263	5.59451	4.87293	6.47687	4.51248	4.88064
TG(12:0/14:0/16:0)	0.404695	0.159335	0.505821	0.457228	0.362922	0.747704	1.80827	0.866136	1.28499	1.19294	2.10306	1.74095	3.31761	1.57042	1.72375
TG(12:0/16:1/16:1)	1.08556	0.283843	1.47178	1.13087	0.0393459	5.63431	20.5583	7.1443	15.5165	9.0956	21.5168	19.7789	28.405	16.5984	18.9091
TG(14:0/16:1/14:0)	1.72617	0.432276	2.25078	1.84797	1.51574	4.78399	13.6986	6.77388	15.6585	7.79004	15.8927	13.3952	17.8766	10.9795	15.3276
TG(14:1/16:1/16:1)	3.91004	0.619106	5.51399	4.12999	3.82506	16.253	64.0259	23.572	49.0736	29.8112	73.2712	62.6984	89.0468	50.1426	35.6316
TG(12:0/18:1/16:1)	10.1996	1.90497	13.7626	10.7617	9.49615	31.3125	96.2518	41.707	84.3329	51.4098	109.235	97.1261	122.292	77.3929	94.5159
TG(14:0/16:0/16:1)	9.21105	2.53059	10.5872	9.09481	7.97243	18.1664	45.1592	23.9144	41.9164	28.2414	58.3445	52.8327	62.3856	41.7354	46.6313
TG(14:0/16:0/16:0)	3.68236	1.37482	4.00898	2.95459	3.54678	5.24	11.5803	6.74375	10.9099	7.82744	17.7275	16.2225	17.453	12.4083	13.3601
TG(16:1/16:1/16:1)	32.3288	6.45692	40.7292	31.9096	30.4606	90.9977	259.513	113.47	221.514	138.575	294.749	279.508	334.192	221.435	252.531
TG(14:0/16:1/18:1)	59.6648	16.83	66.6151	58.7373	49.3458	119.517	305.272	137.037	241.412	148.697	324.073	310.431	333.563	279.709	271.547
TG(14:0/16:0/18:1)	45.0611	16.1568	56.7167	53.4988	40.2783	82.3214	187.404	97.3405	176.924	114.94	251.075	242.507	256.813	174.469	199.105
TG(16:0/16:0/16:0)	16.402	6.22524	21.0392	14.5597	13.5484	29.2963	71.3584	35.3379	62.3412	38.6708	127.247	80.6084	88.4019	57.0722	59.3355
TG(16:1/16:1/17:1)	4.45114	1.42788	6.00568	4.9883	5.38325	14.675	26.9588	12.3259	22.9982	13.6019	41.2589	24.3565	34.2664	25.9923	22.412
TG(16:0/16:0/17:2)	7.18627	3.44923	8.44619	6.82756	6.33115	16.305	33.1302	16.3832	34.6791	17.2557	36.034	33.6961	34.9405	24.4274	30.364
TG(16:0/16:0/17:1)	7.7902	2.66306	9.2611	7.90345	6.11322	13.8679	33.4402	18.1065	34.1882	20.7786	40.186	39.7954	40.0847	27.2465	34.1145
TG(16:0/16:0/17:0)	2.18985	0.75081	2.51686	1.89973	1.19707	3.84254	11.1305	4.84921	9.17126	6.2512	13.2654	13.2519	14.7042	8.474	10.4968
TG(16:0/16:1/18:3)	122.613	23.9617	134.126	102.29	5.74682	255.938	790.497	336.691	700.605	423.119	861.342	969.282	1043.57	673.462	758.805
TG(16:1/16:1/18:1)	0.0522621	0.01722	0.036617	0.0496976	0.0317157	0.116327	1.08632	0.167366	0.293276	0.165142	0.419799	0.308695	0.49047	0.255877	0.308377
TG(16:0/16:1/18:2)	324.731	94.9177	352.314	300.249	19.7369	587.775	1493.06	748.714	1462.62	850.27	1677.28	1772.07	1782.6	1216.96	1497.64
TG(16:0/16:0/18:2)	8.31317	2.37555	9.8332	7.68958	6.63866	14.788	43.9506	22.0518	42.7817	24.2408	55.8423	31.1686	55.2775	33.444	40.4684
TG(16:0/16:0/18:1)	344.102	142.909	411.558	318.797	57.3275	589.01	1440.48	779.863	1412.25	855.14	1932.7	1577.22	1683.66	1323.36	1252.35
TG(16:0/18:0/16:0)	34.0103	11.4154	45.0155	32.014	29.8261	65.5782	183.447	83.2869	153.682	96.6311	230.774	213.992	249.303	154.024	174.013
TG(16:1/17:2/18:3)	3.84675	0.1929	1.41597	1.35563	1.3796	6.74961	17.9998	14.9592	30.0694	17.5442	18.7988	32.8642	19.1611	16.8099	33.6661
TG(17:2/17:2/17:2)	0.451454	0.0472504	0.925276	0.726175	0.367966	8.20981	22.5112	11.7649	13.7025	9.11753	16.6928	13.9023	31.4149	13.421	14.7188
TG(17:1/17:2/17:2)	4.85677	0.891915	6.30435	8.20913	5.02964	9.10178	45.0385	19.5957	35.8385	20.19	70.1659	47.4388	52.1273	40.8693	39.1808
TG(16:0/17:2/18:3)	1.29671	0.726691	1.22901	1.18153	0.975033	1.49992	2.19314	1.56271	2.65055	1.93683	2.60316	2.79442	2.30361	1.77951	1.93349
TG(16:0/17:1/18:3)	14.3882	3.8141	16.1274	13.2224	2.94516	30.7985	84.1254	39.0936	71.125	41.1559	90.3484	86.964	102.48	67.8899	73.6458
TG(17:0/17:2/17:2)	0.298193	0.14808	0.30456	0.256805	0.271637	0.810597	1.67452	0.961687	1.02031	0.946936	0.827472	0.848922	1.35631	1.19055	0.816008
TG(17:1/17:1/17:1)	36.9997	10.9789	40.7859	34.7357	28.8463	67.1493	173.816	97.4493	176.92	97.5181	198.121	213.609	223.466	142.038	165.77
TG(17:0/17:1/17:1)	2.66321	0.745028	2.70548	2.77748	2.79366	13.2049	27.5917	17.3758	20.7224	14.8877	19.152	18.3173	25.176	20.2257	18.7671
TG(16:0/17:0/18:1)	28.16	6.94934	33.7779	35.152	21.8899	57.291	176.109	78.9979	166.021	86.7638	201.223	205.346	223.298	126.653	161.857
TG(17:0/17:0/17:1)	0.556363	0.156825	0.544269	0.602108	0.542392	2.51411	5.64794	3.41594	4.13444	3.02573	4.10342	4.02037	5.46034	4.04364	4.20777
TG(16:1/18:3/18:3)	23.0693	2.9176	27.5558	21.9726	20.3747	78.3158	362.85	112.158	274.111	149.271	367.273	387.693	463.17	277.694	300.731
TG(17:0/17:0/17:0)	0.320674	0.0985963	0.39132	0.403389	0.378368	1.98478	5.57849	3.07125	3.9134	2.4869	4.02711	3.76364	5.45058	3.64115	3.82745
TG(16:1/18:2/18:3)	129.642	20.0758	153.202	116.687	2.742	343.51	1303.9	550.017	1250.73	620.233	1354.89	1678.72	1963.27	1154.68	1335.54
TG(16:0/18:2/18:3)	659.78	159.123	786.505	617.478	12.7545	1365.89	4192.78	1858.75	3645.97	2191.89	4339.68	4295.82	4996.26	3112.16	3731.32
TG(16:0/18:2/18:2)	1754.21	565.125	1959.13	1608.97	1427.81	3213.27	8120.81	4229.36	7549.92	4534.42	8459.54	8683.39	9363.45	6029.24	7101.47
TG(16:0/18:1/18:2)	2262.64	838.691	2545.84	2154.34	1928.17	4637.01	9079.12	5150.11	8328.59	5411.39	9224.32	9440.93	10266.4	6657.69	10026.7
TG(18:1/16:0/18:1)	45.3316	10.9276	54.6266	39.5395	31.5169	96.4122	393.723	175.469	383.109	177.659	362.478	409.079	471.157	265.351	336.684
TG(16:0/18:0/18:1)	541.365	183.644	710.256	556.955	484.544	1085.03	3103.57	1492.13	2711.28	1686.47	3374.01	3513.88	3961.13	2407.47	2926.64
TG(17:1/18:3/18:3)	3.77074	0.769418	5.22381	4.48907	4.20614	20.6145	59.9294	14.4651	30.2681	20.5677	60.3272	33.3919	67.1124	16.7492	27.7557
TG(16:0/18:0/18:0)	27.5754	7.24394	38.3566	27.8239	26.086	59.4447	178.441	81.7578	161.667	96.0059	285.449	259.636	317.374	175.805	211.081
TG(17:0/18:3/18:3)	7.02454	4.17061	7.79874	6.77619	1.0527	8.68516	13.7065	11.0351	15.2793	10.192	13.833	15.904	14.5205	10.7776	11.5297
TG(17:2/18:2/18:2)	1.12731	0.131403	2.02989	1.46024	0.989574	10.441	31.0213	23.8771	27.1915	18.3398	35.6265	27.7429	44.0074	16.664	28.9181
TG(17:1/18:2/18:3)	3.84253	1.30759	3.92175	2.9644	3.16648	5.5301	13.6277	4.56045	12.2116	4.02698	15.3841	15.127	16.3425	10.2507	10.8012
TG(16:1/17:2/20:3)	0.575908	0.0488641	0.988822	0.817837	0.484398	7.59161	23.7215	21.395	16.5809	11.8389	26.0115	18.5321	30.2392	11.5418	18.5734
TG(17:1/18:2/18:2)	15.8753	4.14841	17.8057	13.7852	12.78	32.1959	87.7993	42.7631	77.2102	47.2825	92.5344	96.124	104.69	68.6333	78.6907
TG(16:1/17:1/20:3)	4.71083	2.27455	5.24808	4.28313	3.73407	5.37448	9.25045	6.86521	10.6524	7.02173	10.0679	11.5591	10.1882	7.7952	10.5907
TG(17:0/18:2/18:2)	34.6262	9.94348	36.5953	30.6296	3.56671	62.2976	161.822	85.5135	150.23	92.3381	181.664	189.453	203.412	129.633	157.192
TG(17:0/18:1/18:2)	1.25615	0.346639	1.31612	1.43901	1.29238	5.32978	14.5709	8.37028	11.7592	7.18185	9.56948	10.0594	12.7736	8.51449	9.80169
TG(17:1/17:1/19:0)	88.8118	20.2155	102.452	84.3726	70.0148	230.725	615.474	290.58	602.877	313.698	638.877	676.375	780.405	429.262	561.557
TG(17:0/18:1/18:1)	1.5478	0.404018	1.90668	2.16916	1.66112	9.48158	34.5975	17.9232	2.36818	13.1802	20.5749	20.314	28.595	16.1499	21.5148
TG(16:1/18:2/20:5)	53.8728	5.88213	53.0158	39.4181	37.6925	126.968	584.159	176.499	416.569	243.597	891.397	1006.5	742.009	405.76	462.321
TG(16:0/18:1/19:0)	16.8275	3.50332	20.7534	16.5522	12.2605	42.0559	154.808	66.1912	145.314	79.6495	193.843	194.363	362.743	114.376	158.242
TG(18:1/18:3/18:3)	260.735	50.5364	283.917	225.6	4.90515	556.054	2055.29	795.953	1757.53	898.891	1810.67	2019.22	2180.04	1181.88	1626.89
TG(17:0/18:0/18:0)	0.654821	0.172265	0.940815	0.693636	2.50774	1.79852	7.76626	2.62006	5.27897	3.46171	11.5763	8.63684	11.5121	6.28256	7.22829
TG(18:2/18:2/18:2)	0.257828	0.057139	0.309198	0.219158	0.144805	0.243082	2.63098	0.846303	1.68164	1.21061	2.78621	2.48539	3.2926	1.72572	2.1895
TG(18:1/18:2/18:2)	1.60726	0.408626	1.9292	1.42252	1.34022	3.37127	9.71332	4.69819	8.62318	26.1106	9.00001	10.1376	11.9722	6.80486	8.35053
TG(16:0/18:1/20:4)	984.839	259.042	1029.34	946.087	775.86	1992.02	5370.81	2729.74	4798.85	3258.22	5642.8	5552.09	5892.89	3740.35	4635.87
TG(18:1/18:1/18:3)	1.59158	0.447576	1.68359	1.49277	1.18993	3.15501	9.93388	4.55314	8.44032	4.70389	10.1719	10.9049	12.2913	6.14556	8.44461
TG(18:0/18:2/18:2)	1.5369	0.318643	1.99512	1.81162	1.468	4.59205	16.9592	7.7525	13.1406	7.58345	16.2263	17.6345	22.0068	11.1768	14.0976
TG(16:0/18:1/20:3)	1622.02	530.363	1803.62	1490.16	262.076	2931.59	6674.71	3748.71	5811.82	4250.35	7167.7	7228.72	7975.11	5448.2	6095.06
TG(18:1/18:1/18:1)	1337.01	445.203	1900.91	1292.65	1202.95	2655.41	6355.89	3436.9	5350.36	3610.84	6491.56	6498.81	7213.45	4999.52	5371.55
TG(16:0/18:2/20:1)	0.634803	0.119573	0.623348	0.497173	0.45178	1.66547	5.82041	2.34488	4.89078	3.09851	6.86651	7.18615	10.0942	4.14149	5.99683
TG(17:2/18:3/20:4)	6.49806	3.35108	6.47135	5.41207	5.60091	8.40442	12.1236	9.4014	20.7762	10.9598	16.6794	14.8298	14.4218	11.9981	12.8132
TG(18:0/18:0/18:2)	763.802	244.838	968.536	777.885	731.328	1740.57	4824.13	2348.23	3977.43	3267.52	5046.62	4978.48	5980.9	3695.54	4289.1
TG(17:1/18:2/20:5)	7.35425	3.80152	7.64306	6.42108	0.178223	8.06499	13.1008	10.4537	18.5235	10.4784	20.2363	19.0165	14.1403	11.6589	12.746
TG(16:0/18:1/20:0)	1.25857	0.450979	2.54676	1.13878	2.084	2.0918	4.62601	2.44419	3.78469	3.02537	5.71667	4.98886	6.28632	3.80935	4.1627
TG(16:1/18:0/20:0)	0.0596564	0.0188049	0.0616939	0.0603039	0.0455877	0.324659	1.15448	0.540048	0.538357	0.417021	0.593937	0.808199	0.876634	0.349817	0.61945
TG(17:1/18:1/20:5)	13.4298	3.10965	14.092	11.9274	10.103	38.408	83.9314	41.5116	98.1505	41.1097	78.5294	88.8163	126.232	57.9609	68.6739
TG(17:1/18:2/20:4)	7.83386	4.25189	8.81025	7.25877	7.18304	10.5333	17.3024	11.2166	14.9011	11.6257	18.9845	17.8904	18.0193	14.1407	15.3234
TG(18:0/18:0/18:0)	5.31676	1.69288	10.2597	6.44412	0.234233	17.1676	76.296	21.5621	43.8952	29.1944	119.426	80.6735	118.943	70.7549	72.3948
TG(17:0/18:1/20:5)	26.1476	5.77645	28.2132	23.6988	15.8937	36.4142	95.1198	52.8709	82.5213	85.2639	89.9009	96.1341	100.744	68.5835	120.819
TG(17:1/18:2/20:3)	8.28465	4.19323	9.73704	8.0142	7.15648	10.5749	19.7085	19.0147	18.6214	13.9757	33.2317	23.2511	21.9748	15.8937	20.6304
TG(16:0/17:2/22:4)	0.964632	0.531154	0.751552	0.565135	1.07106	2.95628	4.61655	3.04142	4.28392	3.64812	4.39495	3.39404	4.94833	3.95395	3.83171
TG(17:1/18:1/20:3)	11.7525	3.6516	12.9274	12.1375	9.12198	43.7442	55.6602	31.3169	55.042	69.7301	55.8242	59.511	59.6189	43.4157	50.6209
TG(18:2/18:2/19:0)	21.0875	5.98733	23.4762	19.4141	17.1266	41.7368	115.103	58.002	94.0897	63.3591	123.753	125.196	139.326	87.1397	101.919
TG(16:0/17:0/22:4)	4.31387	1.25906	5.16697	4.15759	3.27851	8.64847	25.3078	11.3183	20.1422	13.6685	25.6226	25.1226	29.6527	16.5389	20.7478
TG(16:1/20:4/20:5)	12.3356	1.30615	12.3915	8.36363	8.46406	27.1792	160	35.4757	117.137	61.0551	165.299	198.344	190.971	118.219	133.161
TG(17:0/18:2/20:1)	26.9739	6.40573	33.5715	26.9746	4.25079	65.3452	205.352	99.7091	178.176	110.23	221.678	223.051	262.349	154.26	185.052
TG(16:0/17:1/22:2)	17.3514	6.09144	17.2009	16.4727	14.164	23.0974	53.4532	27.4505	47.8109	34.2102	56.1618	61.3255	68.4099	42.6585	49.6056
TG(16:1/20:4/20:4)	224.222	28.955	240.093	91.3274	1.825	320.003	1505.54	478.234	1064.28	606.99	1552.18	1740.73	1904.53	1103.7	1095.91
TG(18:1/18:1/19:0)	14.0152	3.19399	18.8229	15.1159	12.777	42.37	161.064	68.3401	132.593	81.472	185.97	169.26	208.36	113.504	140.259
TG(17:2/19:0/19:0)	1.68884	0.391388	1.99159	2.77025	1.69958	13.0048	53.2334	25.4597	32.9095	18.2484	25.7704	24.0075	38.7291	22.7218	28.5986
TG(16:0/18:2/22:6)	1309.96	216.076	1027.79	802.76	697.8	2611.53	5814.32	2427.5	4672.6	2789.7	5247.94	5757.49	4696.54	3370.67	4641.77
TG(18:0/18:1/19:0)	2.25128	0.659303	3.80669	2.59939	0.167615	7.86071	37.921	11.4027	24.4477	15.5678	50.5552	35.3729	49.5607	26.5874	30.7109
TG(18:1/18:2/20:4)	1.4949	0.491402	1.95256	1.4333	1.29374	2.94423	7.89113	3.61054	6.20144	4.19472	7.34587	8.88699	9.40153	5.29611	5.97411
TG(17:0/19:0/19:0)	3.16002	0.947469	3.83261	109.739	90.917	6.04766	12.9717	8.34349	10.1805	458.872	13.174	12.2909	12.8116	13.8205	458.413
TG(18:1/18:1/20:4)	4.97513	1.17609	5.73638	4.72388	4.01371	13.3266	33.3114	16.188	25.0526	18.2738	26.8379	30.6696	33.6341	19.3854	25.7443
TG(16:0/18:1/22:4)	0.32118	0.074594	0.335976	0.286738	0.300259	1.03008	4.67651	1.80449	3.65277	1.93648	5.78245	4.54648	6.63671	2.52496	3.87406
TG(18:1/18:1/20:3)	0.14333	0.0430063	0.15508	0.158936	0.11792	0.559493	1.45731	0.728858	1.01399	0.709557	1.71841	1.55198	2.0361	0.88513	1.42234
TG(18:1/18:1/20:2)	369.281	213.558	473.616	723.2	193.046	1661.85	2711.6	1229.99	2121.58	2529.5	2643.75	2347.58	2905.04	3545.82	2191.28
TG(17:2/20:4/20:4)	3.20317	0.282329	2.24799	1.91266	0.899419	5.62605	40.0163	8.18267	15.9177	10.4786	19.3474	20.7644	22.8467	24.4692	16.5153
TG(17:2/18:2/22:6)	12.129	6.56586	10.9608	9.87764	0.33123	13.3692	25.353	15.0619	19.3532	15.7871	30.7999	34.2245	20.913	16.4305	18.6579
TG(18:1/18:1/20:1)	215.866	71.3831	404.006	239.972	68.7669	623.902	1953.53	839.579	1408.06	923.264	1996.31	1612.93	2137.45	1374.68	1544.47
TG(17:1/18:2/22:6)	7.64343	1.12449	6.02744	5.23892	4.5133	13.1344	43.8952	19.7178	35.8092	23.1372	44.3981	48.1738	47.2221	31.5967	39.2577
TG(17:2/18:2/22:5)	10.5215	6.29616	10.7641	10.4312	9.56555	14.7878	24.9367	15.4444	22.6897	18.1028	25.564	34.2765	24.9051	25.1363	22.9085
TG(18:0/18:1/20:1)	0.0706351	0.0302593	0.756697	0.101418	0.0816261	0.359989	1.03113	0.342289	0.715637	0.465088	1.07674	0.743153	1.35837	9.20247	0.662602
TG(18:1/18:1/20:0)	0.0567172	0.0110848	0.0555598	0.0501837	0.0432119	0.321285	1.22697	0.59027	0.576379	0.375332	0.536475	0.633234	1.03572	0.363886	0.66396
TG(17:0/20:4/20:4)	5.04898	2.58167	6.11985	5.30198	4.86942	7.60175	20.9513	9.44984	12.5124	14.3933	14.3162	12.5933	15.6671	11.8102	18.9612
TG(16:0/18:1/22:0)	5.27377	2.08793	6.25256	3.74836	4.0251	7.83832	21.2499	8.04522	16.7345	11.9664	20.6682	21.9191	24.3172	15.2683	18.2473
TG(18:0/18:0/20:1)	0.0310756	0.0113386	0.0457455	0.0286592	0.0274431	0.151821	0.58939	0.247968	0.253868	0.233654	0.423502	0.314282	0.560097	0.355296	0.317023
TG(17:1/20:2/20:4)	10.6134	3.07332	16.3522	14.1912	12.4497	30.3558	73.4589	40.4623	63.7663	45.3501	73.4638	77.3791	78.2796	54.3947	66.0743
TG(16:1/19:0/22:6)	2.53334	0.327733	4.25058	3.14688	2.03865	26.23	80.7906	54.8442	55.7426	39.4074	88.0338	65.4496	111.528	40.488	71.941
TG(17:0/18:1/22:5)	17.4384	3.96836	19.8953	18.1036	10.6936	26.5809	67.2755	34.8108	57.5423	42.7028	64.5413	65.1838	69.4697	47.8723	56.9951
TG(18:0/19:0/20:5)	33.1323	8.59117	38.1591	31.2489	28.181	58.2259	129.964	73.8515	130.695	83.1228	140.958	141.113	154.998	106.197	125.294
TG(18:3/18:3/22:5)	41.5242	5.99331	45.3976	24.666	0.920727	107.881	687.392	192.952	361.458	303.768	652.062	744.979	792.222	439.596	424.712
TG(17:0/20:2/20:2)	5.7723	1.55397	7.67332	5.75801	5.1513	26.3352	45.8035	20.5766	36.7111	24.3801	46.5797	72.4797	51.4124	33.4681	35.0187
TG(18:2/19:0/20:2)	59.619	25.9693	65.9521	56.1573	48.7714	88.0391	202.461	103.8	184.942	121.327	210.473	213.463	357.863	152.227	270.535
TG(18:2/18:2/22:6)	294.955	42.3036	329.06	216.53	217.681	702.077	2936.29	1030.06	1896.88	1238.43	2767.86	3098.73	3321.11	1889.6	1977.65
TG(17:0/20:1/20:2)	3.68094	0.999984	5.76721	4.10871	0.152598	13.1424	49.2536	20.1269	37.9325	23.1588	55.2419	43.986	59.4929	34.3825	39.0142
TG(18:2/18:2/22:5)	726.806	158.524	802.256	608.388	577.141	1520.85	4711.57	2059.79	3446.18	2433.49	4444.47	4468.17	4767.42	3068.07	3632.55
TG(18:1/18:1/21:0)	1.88051	0.582166	3.34803	2.29761	3.92139	7.15538	34.7085	10.7126	21.4332	14.0127	43.8084	27.961	43.579	23.818	24.9449
TG(17:2/19:0/21:0)	0.557089	0.161384	0.807923	0.847874	0.727225	4.97397	18.7706	9.22143	10.4524	6.23354	10.6335	8.79027	15.2857	7.81386	10.1095
TG(18:1/18:2/22:5)	0.868749	0.226502	1.0665	0.924811	0.870653	1.72531	4.25599	2.07076	3.73513	3.22228	4.76018	4.32586	4.51806	3.02212	3.75872
TG(18:1/18:1/22:6)	1.06172	0.473177	1.08535	0.918586	0.858704	1.99447	5.37641	8.8377	14.0147	2.74114	4.48395	4.24316	4.41119	14.9709	3.67458
TG(18:3/18:3/22:2)	0.421096	0.148969	0.406119	0.345837	0.287411	0.7432	2.31373	1.16561	1.69618	1.11561	1.45047	2.22608	3.02439	1.03396	2.27975
TG(18:2/18:2/22:4)	0.261616	0.199117	0.699121	0.457574	0.420381	0.980056	2.9106	1.30128	2.26792	1.35686	2.98305	2.73686	4.19466	1.96641	1.94066
TG(17:1/20:0/20:0)	0.548518	0.208077	1.06933	0.647819	0.662139	1.95895	10.3064	2.68976	5.49578	3.66416	14.8924	7.59592	12.1713	6.78211	7.62713
TG(18:0/19:0/20:1)	0.138323	0.0443566	0.208539	0.201722	0.171229	1.15689	3.85321	1.98056	2.27849	1.43613	2.38852	2.02546	6.52709	1.7343	2.18569
TG(18:1/18:1/22:5)	0.125816	0.0397688	0.14721	0.19737	0.117156	0.533074	0.960438	0.833333	1.12897	0.578829	1.09583	1.14546	1.2275	0.717517	1.10293
TG(18:1/18:1/22:4)	0.462242	0.155013	2.24889	0.542712	0.480934	1.33834	5.22144	2.15797	3.95214	2.43473	5.53309	5.10911	5.97628	3.603	4.44371
TG(18:0/18:0/22:6)	0.106034	0.0411005	0.135499	0.138936	0.122196	0.493363	1.47009	0.729493	0.971443	0.62198	0.889307	0.95048	1.28131	0.776915	0.798539
TG(18:1/18:1/22:3)	12.22	3.11342	13.9802	11.3203	0.639214	21.4857	47.8388	27.1028	48.1197	31.0166	52.5339	54.295	58.4081	40.6988	47.1695
TG(17:1/20:4/22:6)	2.59672	0.38095	6.35761	2.15153	2.0042	6.33836	19.5889	9.60234	18.1097	11.6148	20.1372	22.4858	24.8958	13.0785	15.5681
TG(18:2/18:2/22:0)	45.7066	15.4054	72.7894	56.4522	4.87556	206.485	739.826	271.801	476.936	316.396	804.74	859.348	790.715	790.21	880.144
TG(17:1/20:4/22:5)	4.6099	2.37509	4.89046	4.30556	4.2864	7.46834	11.8624	8.04692	10.9975	9.06942	12.5805	18.1255	11.3538	9.7862	12.0264
TG(18:1/18:1/22:1)	28.6561	9.92246	70.9075	35.1545	36.8079	124.13	437.1	156.047	259.512	171.375	502.888	389.24	459.783	295.64	309.687
TG(18:0/18:2/22:1)	0.032439	0.011229	0.0501293	0.0387804	0.0434724	0.158205	0.381078	0.280571	0.246562	0.211936	0.519267	0.387539	0.576596	0.160553	0.384367
TG(17:1/20:3/22:5)	5.52572	2.31234	5.43771	5.00284	4.658	9.55728	14.8429	10.3479	14.3788	10.5282	15.5388	15.2602	14.4141	12.5838	13.1592
TG(18:1/18:1/22:0)	22.6063	6.0334	36.2464	20.8441	7.64954	75.6913	342.589	90.7143	164.08	115.416	424.878	227.21	361.208	235.398	230.141
TG(17:0/20:3/22:5)	7.10529	1.58073	8.86359	4.25829	4.18117	13.1246	32.9113	12.958	19.9139	15.1631	24.7699	23.3577	26.7145	19.8292	19.5682
TG(18:2/19:0/22:6)	4.30316	0.475091	6.48652	3.06923	2.31441	13.0243	46.9281	25.5596	29.0938	20.8376	45.6721	51.0546	67.4786	25.7947	39.084
TG(18:0/18:1/22:0)	3.77231	1.78233	11.8697	5.5817	6.16258	29.0528	119.841	37.9311	41.7825	29.7643	169.39	65.4652	122.526	74.7665	71.6804
TG(17:0/20:3/22:4)	6.46612	2.14529	6.23787	4.84486	4.67419	10.6011	28.136	15.0214	25.1153	17.8861	27.9376	26.1314	28.4581	20.2533	22.5627
TG(18:0/20:0/20:0)	0.208305	0.124043	0.583345	0.262873	1.1921	0.885441	5.82324	0.925838	2.04283	1.34108	9.26726	2.96846	5.95565	3.87401	3.42784
TG(20:4/20:4/20:5)	9.76224	1.02312	9.54295	5.4705	0.424121	23.1603	168.742	29.3501	90.262	51.0087	147.93	201.292	192.028	101.15	97.3118
TG(17:0/20:4/22:2)	2.84756	0.941857	3.62613	2.71882	3.02476	8.65482	26.694	11.8608	20.4527	15.2458	25.8667	23.2151	26.2509	12.327	21.2273
TG(16:0/22:6/22:6)	130.635	24.3152	118.969	88.6891	72.3538	220.615	997.335	327.803	656.97	376.61	898.313	1261.51	1163.49	557.566	707.612
TG(16:0/21:0/22:5)	1.37599	1.4373	5.58712	1.61576	0.0181573	4.11502	13.109	11.9786	10.8296	7.90059	27.5564	11.5708	14.0378	8.9661	20.3535
TG(18:1/20:4/22:6)	211.704	40.1579	224.419	173.989	15.741	496.316	1737.37	928.604	1218.8	802.586	2205.44	1570.43	1607.47	990.477	1294.05
TG(18:0/19:0/22:4)	45.4511	19.0983	81.3079	42.2048	37.491	70.0848	149.55	134.416	139.946	98.9505	254.371	167.635	288.761	122.344	140.792
TG(16:0/22:5/22:5)	302.378	60.3775	267.233	225.341	262.926	329.316	2207.37	962.834	1139.04	1176.1	1947.51	1897.96	2067.25	1412.9	1638.24
TG(20:3/20:3/20:3)	0.97665	0.0805718	1.47633	1.09142	0.654925	10.2828	32.9346	20.683	29.0566	12.8929	35.3826	26.8976	45.5354	18.5541	25.9134
TG(17:2/21:0/21:0)	0.742691	0.279126	1.32346	0.859958	0.840734	2.46672	10.7267	3.28726	6.4377	4.47783	15.1277	8.65806	13.3406	8.11913	8.49962
TG(16:1/22:2/22:5)	2.86933	0.45869	4.40098	3.69639	1.01987	19.4807	57.4594	37.799	50.6372	28.4894	54.5206	45.3152	68.8687	25.8299	50.8471
TG(20:2/20:2/20:3)	103.925	22.5238	87.1341	74.9001	77.0048	192.116	734.879	240.244	357.366	424.602	435.279	608.878	456.28	368.181	390.514
TG(20:2/20:2/20:2)	58.1762	22.1946	85.7163	73.5154	1.03757	213.512	601.649	268.267	450.226	374.879	775.235	455.634	779.461	460.444	488.348
TG(18:3/20:2/22:0)	36.7047	11.35	63.7227	30.7945	15.6379	105.512	525.095	137.241	340.108	236.044	548.738	264.262	544.18	385.111	397.721
TG(17:0/22:5/22:5)	0.978139	0.115544	1.30184	1.09339	0.714568	8.20502	26.2681	22.653	16.9525	11.2049	26.1975	18.7545	33.6714	12.3087	22.9128
TG(20:1/20:1/20:1)	6.79468	2.67469	15.9125	8.74249	2.58657	8.87119	153.837	41.5034	72.5521	65.6368	193.995	118.328	162.036	111.813	119.234
TG(20:0/20:1/20:1)	3.50395	1.47686	13.2919	4.65585	2.18685	18.9398	97.6469	29.6782	37.4588	41.2008	135.296	79.8707	133.769	68.9109	61.6358
TG(18:3/22:6/22:6)	1.63152	0.303807	1.79487	2.18977	0.161673	0.989096	28.4807	0.0533386	6.94706	3.21619	26.3099	28.5923	31.1627	16.3745	11.525
TG(20:0/20:0/20:1)	1.51762	0.69259	4.14877	2.11676	2.42979	7.5884	21.0875	3.419	15.8094	11.706	37.3718	25.0884	22.3077	15.9574	25.9658
TG(18:2/22:6/22:6)	31.5739	2.7148	29.9907	15.9085	0.982061	70.6085	487.489	96.5985	225.244	145.107	416.863	540.375	509.797	268.049	259.869
TG(18:2/21:0/22:5)	28.55	7.62217	32.0413	26.5623	0.951947	47.771	108.936	60.3839	215.25	70.5609	135.751	257.542	118.901	87.2904	220.626
TG(20:0/20:0/20:0)	0.022058	0.00163454	0.0239453	0.0279268	0.0229087	0.108884	0.326569	0.191036	0.202127	0.102201	0.128011	0.154401	0.226501	0.143851	0.185116
TG(18:1/22:6/22:6)	85.1019	10.4862	87.7424	59.7071	12.9242	175.869	750.887	237.155	443.159	328.696	644.498	722.502	732.528	441.322	489.534
TG(18:0/21:0/22:6)	43.4216	15.5249	49.4828	42.3475	6.88421	73.7935	161.007	91.0119	199.679	102.973	152.311	164.814	178.189	120.871	139.656
TG(18:2/22:5/22:5)	58.2166	24.6099	72.7041	106.503	52.591	148.4	388.511	183.616	679.784	220.65	346.669	920.049	387.701	244.955	291.556
TG(18:1/22:5/22:5)	77.2219	19.8587	99.7037	72.618	72.8081	187.25	495.27	232.737	371.931	285.428	446.742	430.127	459.361	355.786	386.137
TG(20:4/20:4/22:2)	46.5148	16.3839	83.6219	55.619	71.7831	52.8626	425.376	221.681	333.613	216.971	396.396	272.967	399.944	326.749	356.495
TG(18:2/22:4/22:4)	0.674451	0.0524004	1.17826	0.806011	0.25503	8.11763	27.303	17.2455	20.9022	13.0588	47.5822	22.777	35.9552	12.4293	21.1101
TG(18:1/22:4/22:4)	25.6874	9.02424	33.2504	30.9431	29.1863	78.8092	183.239	88.887	137.172	120.245	162.626	139.413	177.566	138.565	154.131
TG(20:1/20:1/21:0)	0.180575	0.086467	0.383743	0.240318	0.24054	0.70822	3.34643	0.975273	1.92303	1.28863	5.03903	2.54137	4.14335	2.51937	2.39791
TG(19:0/20:1/22:1)	0.0248476	0.0104024	0.0547378	0.0322284	0.0389567	0.192841	0.594982	0.274075	0.336254	0.219003	0.552604	0.274027	0.528716	0.31656	0.339462
TG(18:2/22:2/22:4)	10.9861	4.33421	16.305	12.6061	0.0596777	31.9451	173.789	36.2662	60.5526	42.8351	157.492	65.6902	81.1373	62.6166	65.8951
TG(18:0/22:2/22:6)	1.26355	0.114721	1.13742	0.797201	0.464227	4.87407	14.1842	9.97109	9.81361	7.12638	15.4983	20.5005	19.4008	6.67012	20.2362
TG(17:1/22:0/22:0)	0.00967069	0.00523489	0.0211379	0.0151165	0.0221994	0.0478541	0.255283	0.108073	0.105754	0.169512	0.227094	0.225285	0.221625	0.238405	0.246018
TG(20:2/20:2/22:3)	11.1813	3.62936	17.8089	15.1494	3.48327	46.2139	125.511	86.0772	96.1541	67.0442	109.85	84.6471	86.162	98.1646	96.3788
TG(20:1/20:1/22:4)	15.7201	5.55024	17.4594	14.2764	12.7865	25.3536	61.9831	30.867	51.0756	36.6979	57.3486	58.5538	59.7154	43.8347	50.2887
TG(20:3/20:3/22:0)	7.24131	2.40395	14.6942	10.1709	3.97896	40.208	130.992	49.8286	92.2041	60.1727	217.708	85.407	130.595	136.6	98.0825
TG(19:0/22:6/22:6)	0.273223	0.173812	0.358929	0.342222	0.380459	0.69913	1.03256	0.664485	0.837757	0.689405	1.28503	0.70138	0.924175	0.787777	0.960624
TG(20:0/20:4/22:1)	3.607	1.40504	8.49943	4.9636	5.52999	20.7018	89.9556	23.7577	41.8284	31.2329	112.636	52.9842	90.1003	63.5552	58.3286
TG(20:1/20:2/22:1)	1.44679	0.591209	3.33015	2.06132	3.64258	13.4324	63.101	9.12101	5.96577	5.99568	45.1533	36.7582	60.1633	40.9366	27.4843
TG(20:1/20:1/22:1)	0.975691	0.423516	3.13972	1.26059	0.47182	4.9094	26.1416	7.77763	10.9691	10.6293	33.3135	19.4873	25.5979	17.6942	15.5911
TG(20:4/22:6/22:6)	3.49105	0.306823	3.49025	2.13422	0.210228	8.37733	69.3952	12.6671	31.2315	19.3067	60.2027	80.2253	70.5233	37.3044	36.0622
TG(20:1/20:1/22:0)	0.48555	0.322105	1.05999	0.882462	0.359186	2.01041	18.0487	2.84477	4.53924	3.53808	24.8394	6.91882	12.5466	7.71716	7.20703
TG(20:4/22:5/22:6)	5.20156	0.700733	6.27472	4.89447	0.974119	18.8932	56.0542	25.0289	48.7701	35.7268	66.0971	60.0401	76.6147	51.5174	53.1225
TG(20:0/20:0/22:1)	0.269723	0.12883	0.297137	0.31015	0.389619	1.049	5.99607	1.28852	2.46256	1.908	4.62807	3.67626	4.39898	4.31555	3.58584
TG(20:4/22:5/22:5)	15.0814	2.28829	18.6771	13.6454	13.3582	43.6542	172.826	57.1592	111.683	78.589	149.589	147.863	160.071	115.268	117.294
TG(20:3/22:5/22:5)	16.7677	4.2032	27.3922	17.723	4.8509	44.8564	190.406	53.3854	126.362	68.3454	114.706	98.7386	117.431	91.3348	136.16
TG(20:4/22:4/22:4)	21.075	5.18517	27.3886	22.6368	4.7437	31.823	72.3553	53.4014	105.165	83.2764	130.704	58.2419	130.733	86.3791	108.753
TG(20:3/22:4/22:4)	9.04865	3.38549	12.1256	11.997	10.9725	28.8078	65.0339	34.3979	49.2871	36.8934	62.0756	51.9846	56.81	54.568	57.3174
TG(20:5/22:3/22:3)	0.609074	0.0968698	0.886392	0.692037	0.411675	8.74459	11.7751	10.1231	9.74277	11.6536	11.3825	11.2814	13.8348	5.97724	10.8914
TG(20:0/22:5/22:5)	7.6896	4.17509	10.5809	9.92035	3.76618	36.5931	54.2095	28.903	61.9917	35.7697	52.0568	42.7403	50.6461	46.3219	47.8697
TG(20:2/22:3/22:4)	3.95276	1.3334	6.31096	5.03494	5.5655	15.1328	38.817	17.576	27.8488	21.3913	51.8527	25.7338	33.6238	45.5584	28.8428
TG(20:2/21:0/22:0)	0.0362213	0.0143796	0.0463963	0.0407037	0.0476929	0.14127	0.503057	0.222455	0.327017	0.183411	0.271484	0.278085	0.37778	0.24982	0.287838
TG(20:1/22:3/22:4)	2.59388	0.962082	4.00773	3.4576	3.65127	11.3092	28.8324	13.0741	20.7465	17.279	24.6133	18.0393	26.1193	22.7854	21.9478
TG(20:2/22:1/22:4)	2.00789	0.585226	3.33748	2.88719	3.03436	11.0509	35.6823	15.0656	24.4807	17.8017	31.7764	23.5012	31.5417	26.2453	24.9822
TG(20:2/22:1/22:3)	1.0764	0.384413	2.32837	1.52672	0.805251	6.8441	25.9511	7.85577	13.3173	10.4599	30.7024	15.7311	25.765	20.2076	17.4908
TG(20:0/22:3/22:2)	0.918832	0.346294	1.41521	1.1661	0.954467	3.40028	14.6345	3.81432	6.3638	5.51014	20.1571	12.5008	22.0391	10.6016	9.11822
TG(22:6/22:6/22:6)	1.3943	0.113073	1.08374	0.631356	0.651522	2.08878	19.4096	2.6358	6.83225	4.3516	16.0633	23.5984	20.504	9.89311	8.2535
TG(22:5/22:6/22:6)	2.07623	0.229317	2.12703	1.2949	1.49958	5.50735	42.9917	7.83776	20.0039	10.9116	30.6699	33.4639	32.2772	21.4041	23.9529
TG(20:1/22:1/22:1)	0.228521	0.0893559	0.405026	0.357945	0.296253	0.919355	4.63236	1.17068	2.88932	1.95076	5.85922	3.6272	5.62466	2.99279	3.1827
TG(22:4/22:6/22:6)	3.2844	0.392292	3.74635	2.6319	2.7116	9.39352	46.0441	12.6562	26.2536	17.5084	38.7926	63.8473	46.3557	53.2512	27.816
TG(20:0/22:1/22:1)	0.243771	0.0594288	0.302085	0.178027	0.197689	0.564365	2.93458	0.8571	2.27097	1.46749	4.0173	3.14406	4.26879	1.95517	2.21994
TG(22:5/22:5/22:5)	4.68464	0.942969	6.17371	5.1693	4.95708	15.1231	49.1576	18.2307	32.0851	24.0439	39.7415	39.4648	42.3942	33.8242	35.761
TG(22:1/22:6/22:6)	1.96507	0.901707	4.56809	2.47875	2.31175	6.58463	24.5921	9.85735	6.78858	8.58172	20.3621	8.88851	10.4787	7.79284	10.8539
TG(22:4/22:4/22:4)	1.01704	0.433985	3.88569	1.4651	2.02264	6.43855	4.04053	7.12058	6.59927	9.80922	13.4955	5.72436	8.71409	9.04804	11.4703
TG(22:3/22:4/22:4)	1.89909	0.742179	2.66324	2.32701	2.26572	5.55105	13.7049	6.07771	10.0249	11.8101	10.9244	8.41988	11.2087	10.7055	9.54074
TG(22:0/22:5/22:5)	1.23867	0.483677	2.11563	2.42982	2.01173	7.75238	19.0878	6.49906	9.64997	11.3717	16.4213	8.84067	15.6442	11.1415	14.3404
TG(22:1/22:4/22:4)	1.41088	0.239103	2.13946	0.846697	0.988085	3.52148	9.98092	7.12147	12.411	5.43246	15.1422	6.5999	9.03064	7.121	12.4596
TG(22:2/22:2/22:4)	0.700361	0.255638	1.3073	0.934786	1.06807	3.88063	12.9447	3.56725	8.37845	5.85799	7.24297	4.32269	11.6283	5.65133	9.3377
TG(22:1/22:3/22:3)	0.225667	0.147836	1.05704	0.359252	0.360424	1.7318	5.47657	2.02345	3.37365	2.76065	12.0615	3.20852	5.46981	4.44749	3.74296
